# Supplementary material for: Catalytic oxygen evolution from hydrogen peroxide bytrans-[Co(en)2Cl2]@InBTB metal–organic framework catalytic system
Source: Royal Society of Chemistry journal article supplement (doi:10.1039/d2ra02208g), 2022-01-01
Supplement: d2ra02208g1.pdf [file d2ra02208g1.pdf]

Supporting Information

**Catalytic oxygen evolution from hydrogen peroxide by  
*trans*-[Co(en)<sub>2</sub>Cl<sub>2</sub>]@InBTB metal-organic framework  
catalytic system**

**Sukbin Yoon,<sup>a</sup> In-Hwan Choi,<sup>a</sup> Youngmee Kim,<sup>\*b</sup> and Seong Huh<sup>\*a</sup>**

*<sup>a</sup>Department of Chemistry and Protein Research Center for Bio-Industry, Hankuk University of Foreign Studies, Yongin 17035, Republic of Korea. E-mail: shuh@hufs.ac.kr*

*<sup>b</sup>Institute of Nano-Bio Technology, Department of Chemistry and Nano Science, Ewha Womans University, Seoul 03760, Republic of Korea, E-mail: ymeekim@ewha.ac.kr*

**Table S1.** The comparison of trigonal unit cell dimensions for as-prepared InBTB and various guest@InBTB MOFs.

| MOFs                                                       | $a$ (Å)     | $b$ (Å)     | $c$ (Å)     | $V$ (Å <sup>3</sup> ) | Ref.      |
|------------------------------------------------------------|-------------|-------------|-------------|-----------------------|-----------|
| InBTB                                                      | 44.2269(19) | 44.2269(19) | 42.519(2)   | 72026(6)              | [1]       |
| <i>trans</i> -[Co(en) <sub>2</sub> Cl <sub>2</sub> ]@InBTB | 44.879(8)   | 44.879(8)   | 42.029(7)   | 73311(22)             | This work |
| RD@InBTB                                                   | 45.597(6)   | 45.597(6)   | 40.718(8)   | 73314(21)             | [1]       |
| Ru(bpy) <sub>3</sub> @InBTB                                | 44.7175(10) | 44.7175(10) | 42.1464(11) | 72987(4)              | [3]       |
| Ru(phen) <sub>3</sub> @InBTB                               | 44.8647(7)  | 44.8647(7)  | 41.8779(8)  | 73000(3)              | [3]       |
| Ru(bpz) <sub>3</sub> @InBTB                                | 45.1932(4)  | 45.1932(4)  | 41.6636(5)  | 73694(16)             | [3]       |

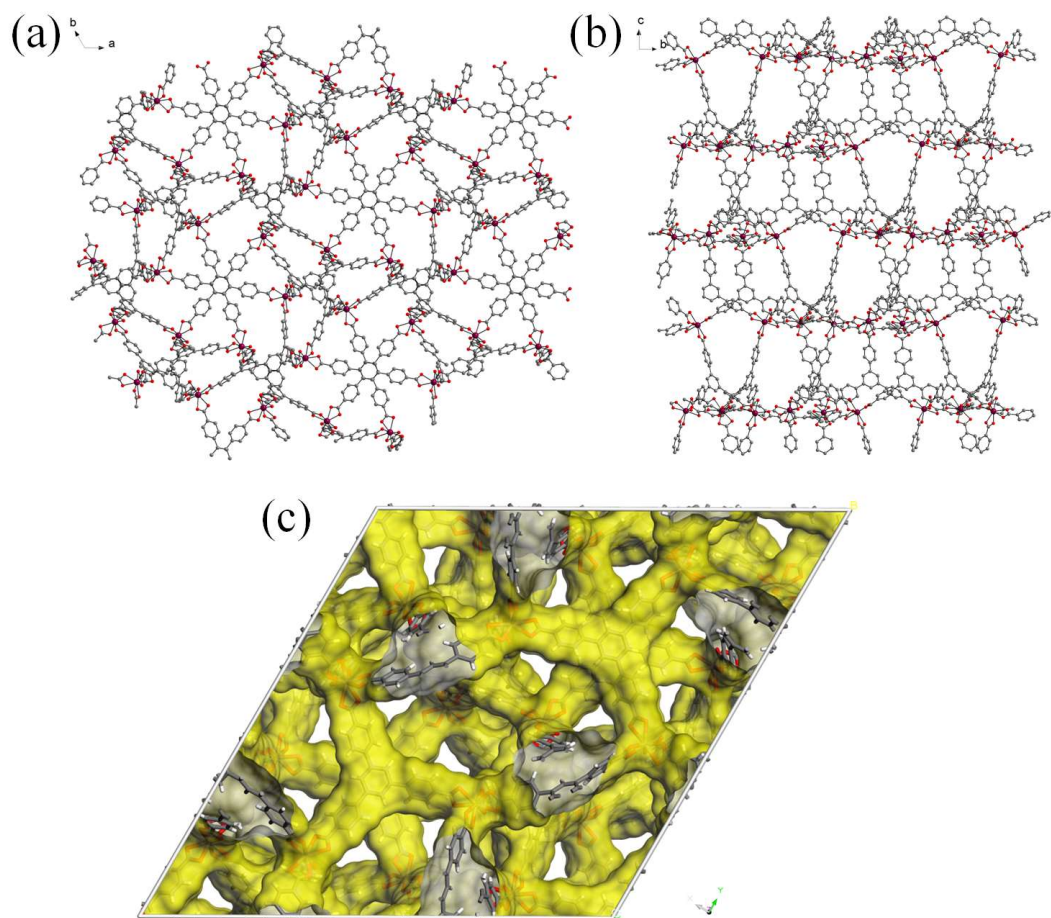

**Figure S1.** The crystal structure of a doubly-interpenetrated InBTB framework shown along the  $c$ -axis (a) and the  $a$ -axis (b). Hydrogen atoms are omitted for clarity. The corresponding Connolly surface (c) [1].

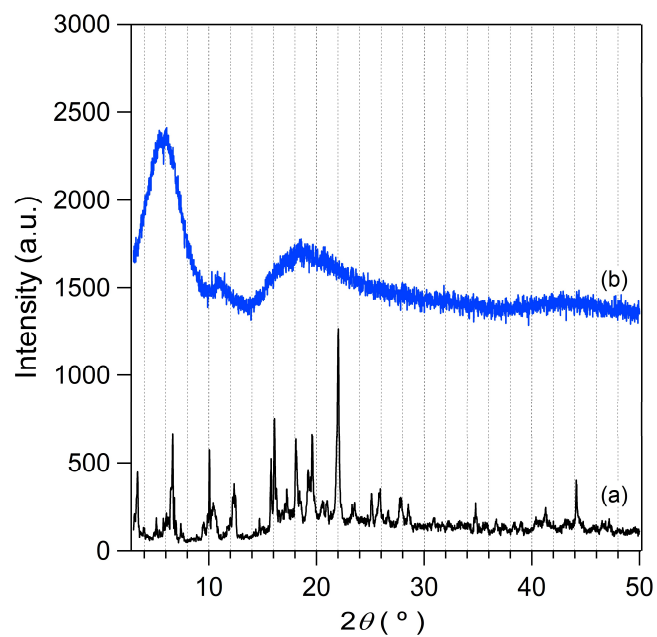

**Figure S2.** PXRD patterns of as-prepared InBTB (a) and *trans*-[Co(en)<sub>2</sub>Cl<sub>2</sub>]@InBTB (b).

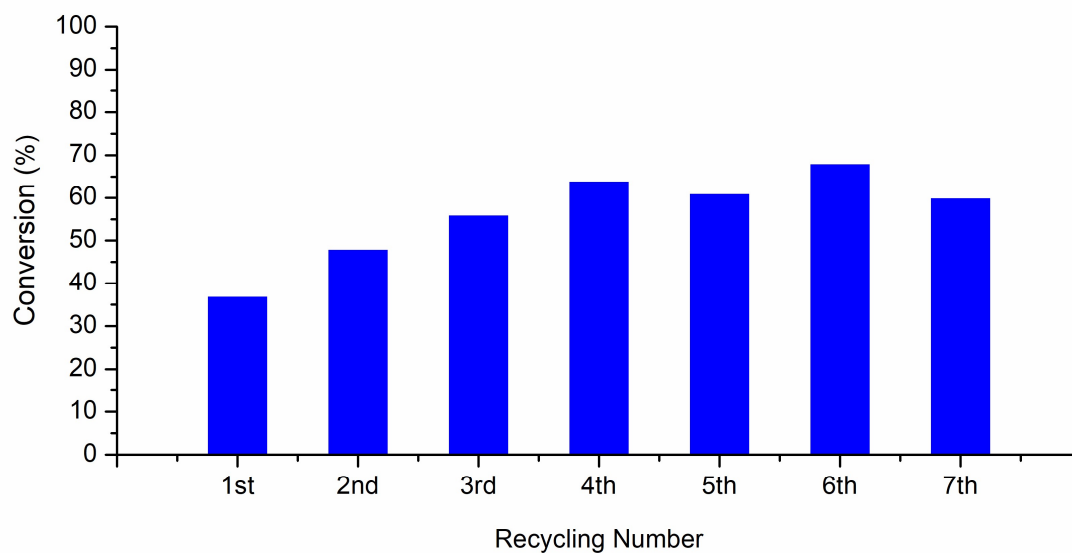

**Figure S3.** Recycling experimental results of H<sub>2</sub>O<sub>2</sub> decomposition reaction catalyzed by *trans*-[Co(en)<sub>2</sub>Cl<sub>2</sub>]@InBTB at 40 °C.

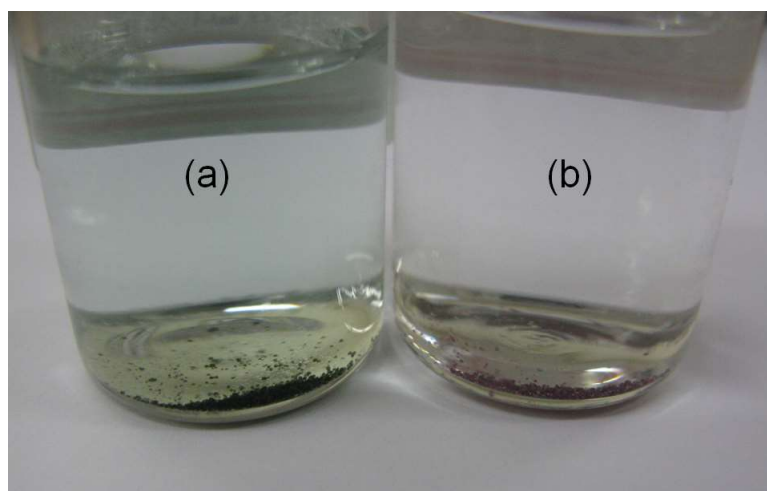

**Figure S4.** Digital photo images of the ethanol suspension of *trans*-[Co(en)<sub>2</sub>Cl<sub>2</sub>]<sup>+</sup>@InBTB formed through the encapsulation of *trans*-[Co(en)<sub>2</sub>Cl<sub>2</sub>]<sup>+</sup> ion by InBTB (a) and H<sub>2</sub>O<sub>2</sub>-treated *trans*-[Co(en)<sub>2</sub>Cl<sub>2</sub>]<sup>+</sup>@InBTB in deionized water (b).

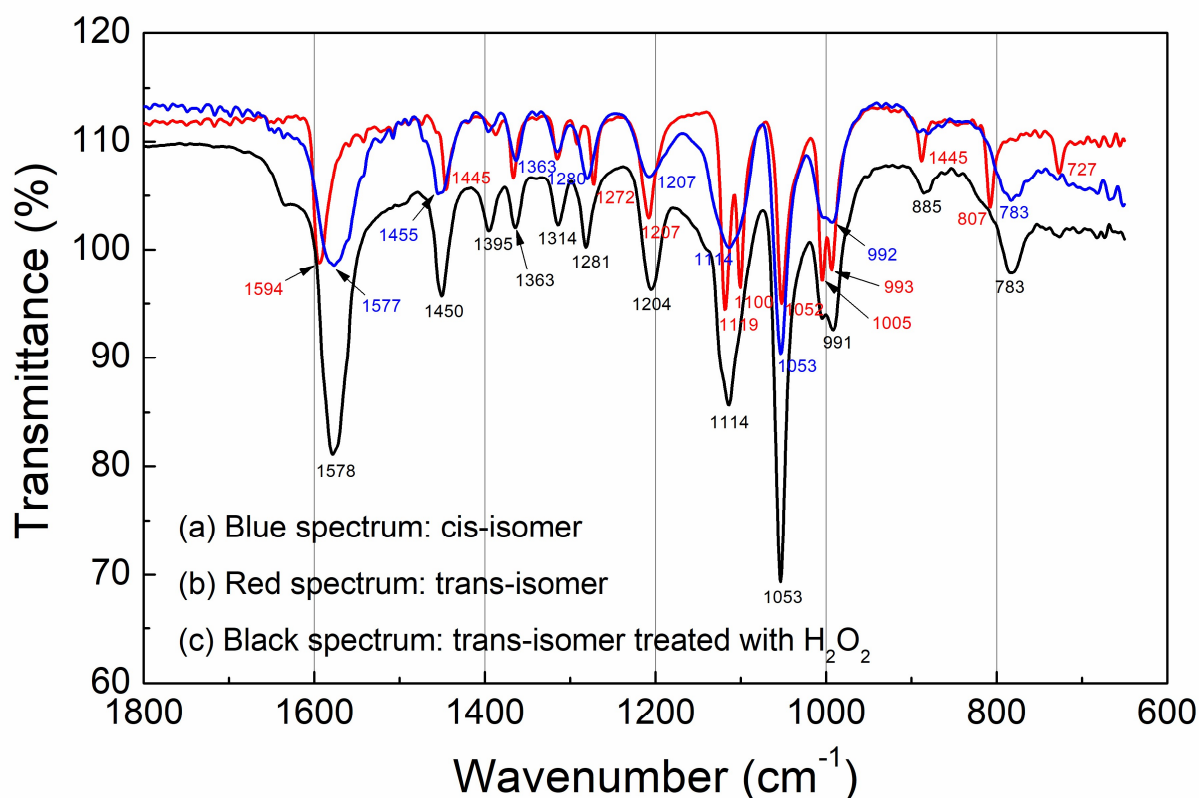

**Figure S5.** FT-IR spectra of *cis*-[Co(en)<sub>2</sub>Cl<sub>2</sub>]Cl (a), *trans*-[Co(en)<sub>2</sub>Cl<sub>2</sub>]Cl (b), and H<sub>2</sub>O<sub>2</sub>-treated *trans*-[Co(en)<sub>2</sub>Cl<sub>2</sub>]Cl (c).

## **References**

- [1] E.-Y. Cho, J.-M. Gu, I.-H. Choi, W.-S. Kim, Y.-K. Hwang, S. Huh, S.-J. Kim and Y. Kim, *Cryst. Growth Des.*, 2014, **14**, 5026-5033.
- [2] J. C. Bailar, *Inorg. Synth.*, 1946, **2**, 222-225.
- [3] I.-H. Choi, S. Yoon, S. Huh, S.-J. Kim and Y. Kim, *Chem. Eur. J.*, 2020, **26**, 14580-14584.
